# Supplementary material
Source: PubMed Central journal article supplement (PMC10563584)
Supplement: NIHMS1930973-supplement-Supplements.pdf [file NIHMS1930973-supplement-Supplements.pdf]

Table 4 - Short-term and longer-term prediction of response to IASI in subsample<sup>†</sup>

| Predictor Variable in Regression                   | Short-Term Responder<br>(Yes/No) | Longer-Term Responder<br>(Yes/No) |
|----------------------------------------------------|----------------------------------|-----------------------------------|
|                                                    | Relative Risk (95% CI)           | Relative Risk (95% CI)            |
| Previous ligament/meniscus injuries, frequency (%) |                                  |                                   |
| No                                                 | Reference category               | Reference category                |
| Yes                                                | 0.63 (0.44 to 0.91)              | 0.86 (0.35 to 2.10)               |
| Crepitus <sup>a</sup>                              |                                  |                                   |
| Absent                                             | Reference category               | Reference category                |
| Audible and/or palpable                            | 1.17 (0.66 to 2.08)              | 1.33 (0.21 to 8.26)               |
| Quadriceps Muscle Wasting <sup>a</sup>             |                                  |                                   |
| Absent                                             | Reference category               | Reference category                |
| Possible                                           | 1.37 (1.05 to 1.79)              | 2.01 (0.62 to 6.53)               |
| Present                                            | 1.10 (0.83 to 1.47)              | 1.75 (0.63 to 4.87)               |
| Bony Enlargement <sup>a</sup>                      |                                  |                                   |
| Absent                                             | Reference category               | Reference category                |
| Unsure                                             | 1.05 (0.76 to 1.46)              | 0.55 (0.08 to 3.57)               |
| Present                                            | 0.86 (0.68 to 1.09)              | 0.68 (0.30 to 1.52)               |
| Anserine Tenderness                                |                                  |                                   |
| Absent                                             | Reference category               | Reference category                |
| Present                                            | 1.27 (1.06 to 1.52)              | 1.14 (0.50 to 2.59)               |
| Patellofemoral Tenderness                          |                                  |                                   |
| Absent                                             | Reference category               | Reference category                |
| Present                                            | 1.27 (1.04 to 1.55)              | 0.97 (0.46 to 2.06)               |
| Tibiofemoral Tenderness                            |                                  |                                   |
| Absent                                             | Reference category               | Reference category                |
| Lateral tibiofemoral Joint                         | 1.26 (0.86 to 1.84)              | 2.51 (0.91 to 6.96)               |
| Medial tibiofemoral Joint*                         | 1.42 (1.10 to 1.82)              | 1.22 (0.45 to 3.27)               |
| Medial & lateral tibiofemoral joint                | 1.38 (1.03 to 1.84)              | 1.96 (0.73 to 5.31)               |
| Ballottement                                       |                                  |                                   |
| Absent                                             | Reference category               | Reference category                |
| Present with or without click                      | 0.83 (0.61 to 1.12)              | 0.32 (0.08 to 1.27)               |
| Bulge Sign <sup>a</sup>                            |                                  |                                   |
| 0                                                  | Reference category               | Reference category                |
| Trace                                              | 1.00 (0.79 to 1.26)              | 1.00 (0.42 to 2.36)               |
| 1                                                  | 0.94 (0.68 to 1.30)              | 0.55 (0.13 to 2.29)               |
| 2                                                  | 0.83 (0.54 to 1.28)              | 1.09 (0.35 to 3.47)               |
| 3                                                  | 0.83 (0.37 to 1.89)              | 1.46 (0.26 to 8.08)               |
| Quadriceps Muscle Strength (Nm/kg)                 | 0.92 (0.74 to 1.16)              | 1.45 (0.73 to 2.85)               |
| Knee Range of Movement (degrees)                   |                                  |                                   |
| Flexion (0°-180°)                                  | 1.00 (0.99 to 1.01)              | 1.01 (0.98 to 1.04)               |
| Extension (0°-180°)                                | 1.00 (0.98 to 1.02)              | 1.01 (0.94 to 1.09)               |

---

<sup>†</sup>N=101 in all variables apart quadriceps muscle strength where N=98 due to size of limb being too large to allow testing in 3 participants. <sup>‡</sup>Further testing done using pairwise comparisons for equality by creating dummy variable coding confirms non-significance. <sup>\*</sup>Further testing done using pairwise comparisons for equality by creating dummy variable coding confirms medial tibiofemoral joint tenderness improved response at short-term only.

For Peer Review

Supplementary Table 1 - Baseline characteristics in those without and with additional clinical assessment

| Variable                                                          | Participants with no added clinical assessment | Participants with additional clinical assessment |
|-------------------------------------------------------------------|------------------------------------------------|--------------------------------------------------|
| Number                                                            | 98                                             | 101                                              |
| Age (years), mean (SD)                                            | 62.3 (10.2)                                    | 63.3 (10.5)                                      |
| Females, frequency (%)                                            | 50 (51.0)                                      | 55 (54.5)                                        |
| Number of days to follow up appointment, median (IQR)             | 8.0 (7.0 to 14.0)                              | 8.0 (7.0 to 14.0)                                |
| KOOS pain subscale score (0-100)*, median (IQR)                   | 45.8 (38.9 to 58.3)                            | 41.7 (36.1 to 52.8)                              |
| Pain on nominated activity VAS (0-10)**, median (IQR)             | 6.9 (5.6 to 7.7) <sup>a</sup>                  | 7.1 (5.8 to 8.4) <sup>†</sup>                    |
| Pain in last week VAS (0-10)**, median (IQR)                      | 6.4 (4.6 to 7.8) <sup>a</sup>                  | 6.6 (5.1 to 8.2) <sup>†</sup>                    |
| No. of responders to injection, at follow-up visit, frequency (%) | 68 (69.4)                                      | 78 (77.2)                                        |

\*KOOS pain subscale is scored from 100 (no pain) to 0 (extreme pain); \*\*VASs are scored from 0 (no pain) to 10 (pain as bad as you can imagine); <sup>a</sup>5 and 2 participants neglected to complete their pain on nominated activity VAS and pain in last week VAS, respectively; <sup>†</sup>4 and 2 participants neglected to complete their pain on nominated activity VAS and pain in last week VAS, respectively; SD = Standard Deviation; IQR = Interquartile Range

Or Peer Review

Supplementary Table 2 – Multivariable Model<sup>A</sup> Retaining Variables Associated with Short-Term Response to IASI

| Predictor Variable in Regression                   | Short-term responder (Yes/No)       |                     |
|----------------------------------------------------|-------------------------------------|---------------------|
|                                                    | Relative Risk (95% CI)              |                     |
| <b>Psychological factors</b>                       |                                     |                     |
| IPQ-B Treatment Score (0-10)                       |                                     | 0.97 (0.93 to 1.02) |
| <b>Treatment-Related Factors</b>                   |                                     |                     |
| Synovial Fluid Aspiration (yes vs no [ref.])       |                                     | 0.95 (0.77 to 1.19) |
| <b>Clinical Factors</b>                            |                                     |                     |
| Previous ligament/meniscus injuries, frequency (%) |                                     | 0.62 (0.43 to 0.90) |
| Quadriceps Muscle Wasting <sup>a</sup>             |                                     |                     |
|                                                    | Absent                              | Reference category  |
|                                                    | Possible                            | 1.38 (1.08 to 1.78) |
|                                                    | Present                             | 1.08 (0.83 to 1.42) |
| Anserine Tenderness                                |                                     |                     |
|                                                    | Absent                              | Reference category  |
|                                                    | Present                             | 1.12 (0.95 to 1.32) |
| Patellofemoral Tenderness                          |                                     |                     |
|                                                    | Absent                              | Reference category  |
|                                                    | Present                             | 1.20 (0.99 to 1.46) |
| Tibiofemoral Tenderness                            |                                     |                     |
|                                                    | Absent                              | Reference category  |
|                                                    | Lateral tibiofemoral Joint          | 1.06 (0.76 to 1.49) |
|                                                    | Medial tibiofemoral Joint           | 1.16 (0.89 to 1.52) |
|                                                    | Medial & lateral tibiofemoral joint | 1.18 (0.89 to 1.56) |

N=95 due to complete case analysis. <sup>a</sup>Poisson regression using robust standard errors

Supplementary Table 3 - Longer-term prediction of response to IASI: Number of pain sites, depression and IPQ-B Timeline Score as categorical variables

| Predictor Variable in Regression  | Longer-term responder (Yes/No) |                     |
|-----------------------------------|--------------------------------|---------------------|
|                                   | N                              | Risk Ratio (95% CI) |
| Number of Pain Sites (range 0-10) | 177                            | Reference category  |
|                                   | <2                             | 1.11 (0.50 to 2.46) |
|                                   | ≥2 to <5                       | 0.44 (0.16 to 1.25) |
| HAD – Depression (0-21)           | 170                            | Reference category  |
|                                   | <3                             | 0.61 (0.30 to 1.27) |
|                                   | ≥3 to <6                       | 0.44 (0.21 to 0.93) |
| IPQ-B Timeline Score (0-10)       | 172                            | Reference category  |
|                                   | <8                             | 0.82 (0.38 to 1.76) |
|                                   | ≥8 to <10                      | 0.51 (0.25 to 1.05) |

For Peer Review

Supplementary Table 4 – Multivariable Model<sup>^</sup> Retaining Variables Associated with Longer-Term Response to IASI

| Predictor Variable in Regression  | Longer-term responder (Yes/No)<br>Relative Risk (95% CI) |
|-----------------------------------|----------------------------------------------------------|
| <b>Symptoms</b>                   |                                                          |
| Number of Pain Sites (range 0-10) | 0.94 (0.75 to 1.18)                                      |
| Chronic Widespread Pain (ACR)     | 0.41 (0.10 to 1.72)                                      |
| <b>Psychological factors</b>      |                                                          |
| HAD – Depression (0-21)           | 0.94 (0.84 to 1.05)                                      |
| IPQ-B Timeline Score (0-10)       | 0.89 (0.81 to 0.99)                                      |

N=141 due to complete case analysis. <sup>^</sup>Log-binomial model

For Peer Review
